# Supplementary material for: Chemiluminescence emission in cholesteric liquid crystalline core–shell microcapsules
Source: Royal Society of Chemistry journal article supplement (doi:10.1039/c4tc00699b), 2014-01-01
Supplement: c4tc00699b1.pdf [file c4tc00699b1.pdf]

## Electronic Supporting Information

### Chemiluminescence Emission in Cholesteric Liquid Crystalline Core-shell Microcapsules

Y. Iwai<sup>a</sup>, H. Kaji<sup>a</sup>, Y. Uchida<sup>a,b\*</sup> and N. Nishiyama<sup>a</sup>

<sup>a</sup>Graduate School of Engineering Science Osaka University

1-3 Machikaneyama-cho, Toyonaka, Osaka, 560-8531, Japan

<sup>b</sup>JST, PRESTO, 4-1-8 Honcho, Kawaguchi, Saitama, 332-0012, Japan

\*Corresponding author

Email address: [yuchida@cheng.es.osaka-u.ac.jp](mailto:yuchida@cheng.es.osaka-u.ac.jp)

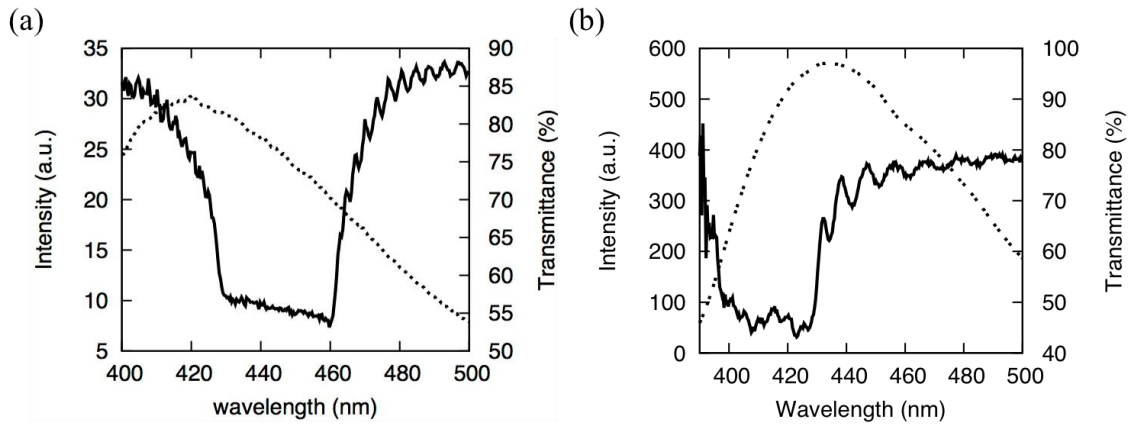

Figure S1. Transmittance spectra of the CLC mixture **1** (solid line) (a), CLC mixture **2** (solid line) (b) and emission spectra (Intensity vs. Wavelength) of luminol (broken line).

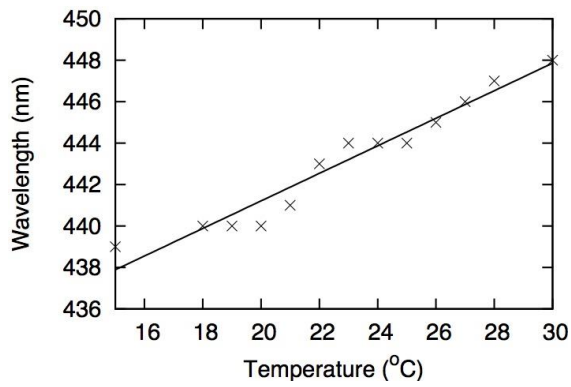

Figure S2. Temperature dependence of the PBG center wavelength of the CLC materials used.

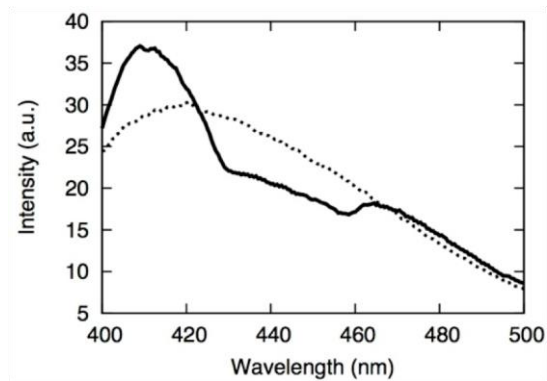

Figure S3. Emission spectra (Intensity vs. Wavelength) of luminol with CLC reflectors (solid line) and without the reflectors (broken line).

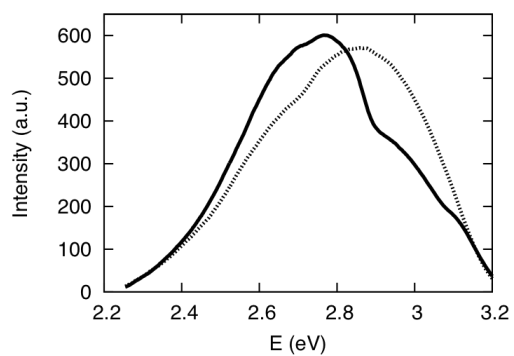

Figure S4. Emission spectra (Intensity vs. Wavelength) of luminol with CLC reflectors (solid line) and without the reflectors (broken line). The PBG of CLC was lower than the maximum emission intensity of luminol reaction.

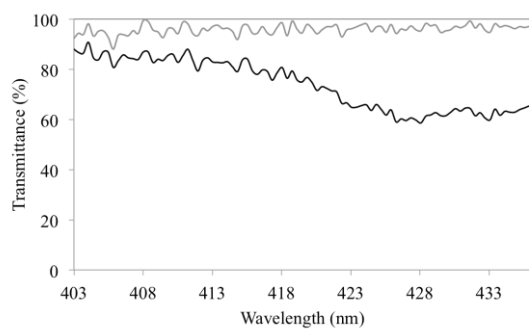

Figure S5. Transmittance spectra of CLC (black line) and NLC (grey line).
